# Supplementary material for: Factors associated with resistance of HIV-1 reservoir viruses to neutralization by autologous IgG antibodies
Source: JCI journal article supplement (doi:10.1172/jci194081), 2025-07-29

Supplemental Material for:

Factors associated with resistance of HIV-1 reservoir viruses to neutralization by autologous IgG antibodies

Natalie F. McMyn, Joseph Varriale, Hanna W. S. Wu, Vivek Hariharan, Milica Moskovljevic, Toong Seng Tan, Jun Lai, Anushka Singhal, Kenneth Lynn, Karam Mounzer, Pablo Tebas, Luis J. Montaner, Rebecca Hoh, Xu G. Yu, Mathias Lichterfeld, Francesco R. Simonetti, Colin Kovacs, Steven G. Deeks, Janet M. Siliciano, and Robert F. Siliciano

### Figures

**Supplemental Figure 1.** Plasma HIV-RNA levels and CD4<sup>+</sup> T cell counts of PWH on ART.

**Supplemental Figure 2.** Neutralization by aNAbs for reservoir viruses of PWH in the aNAb-resistant group.

**Supplemental Figure 3.** Neutralization by aNAbs for reservoir viruses of PWH in the aNAb-sensitive group.

**Supplemental Figure 4.** No correlation between aNAb IC<sub>50</sub> values and the number of isolates with identical *env* sequences.

**Supplemental Figure 5.** Clinical history and reservoir characteristics compared between participants in the aNAb-resistant and aNAb-sensitive groups.

**Supplemental Figure 6.** Relationship between aNAb neutralization and time on ART.

**Supplemental Figure 7.** HIV-1 western blot analysis of IgG purified from plasma of PWH on long-term ART.

**Supplemental Figure 8.** Gating strategy for ADCC experiments illustrated using a representative control well with infected CEM.NKR.CCR5 cells and no NK cells.

### Tables

**Supplemental Table 1.** Characteristics of study participants.

**Supplemental Table 2.** Isolates with IIP > 5.

**Supplemental Table 3.** Variable sensitivity of isolates from the aNAb-resistant group to neutralization by bNAbs.

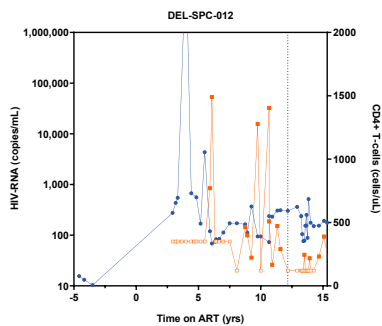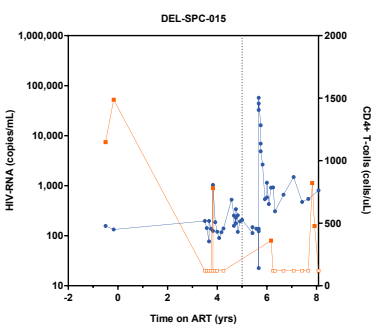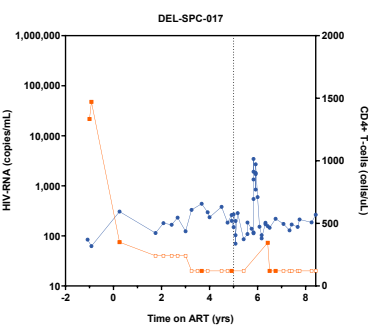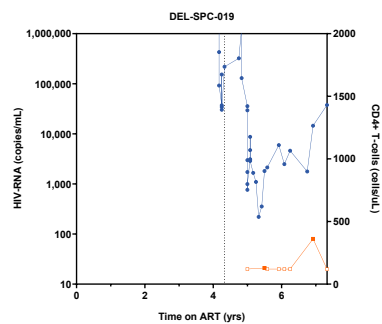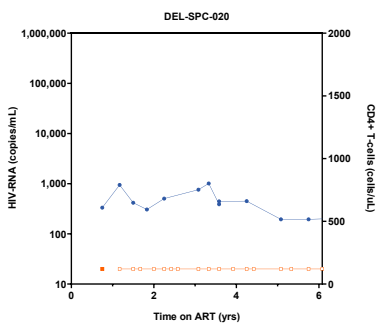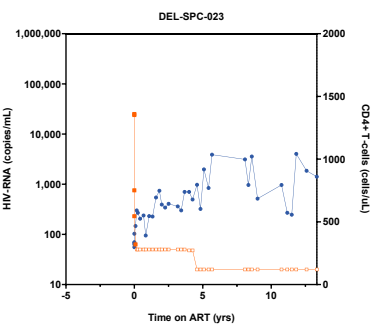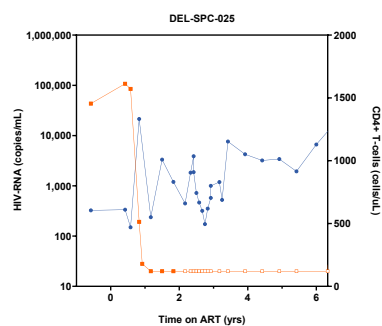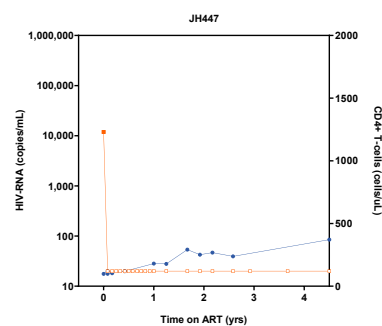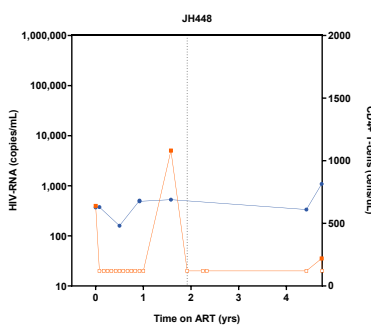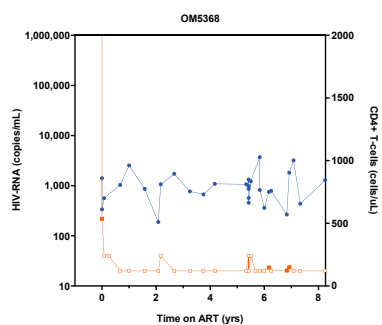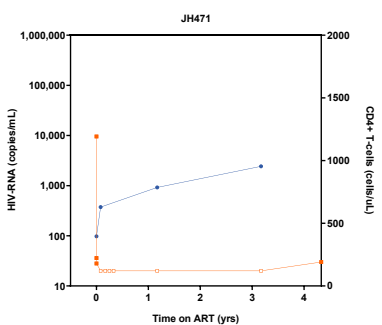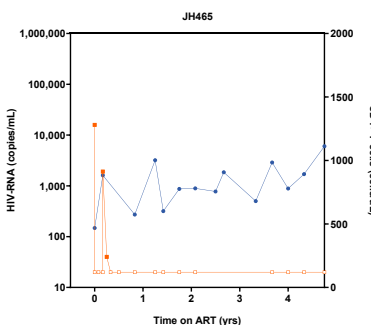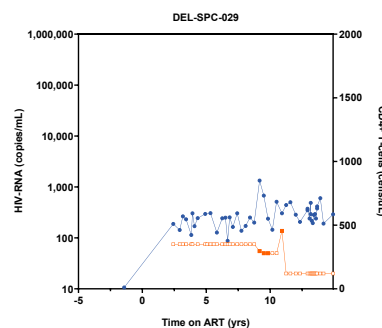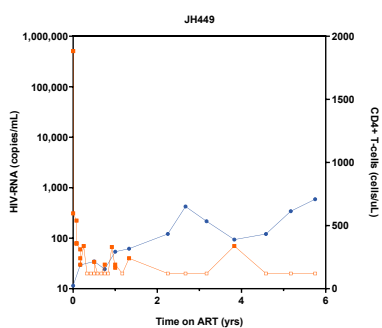

**Supplemental Figure 1.** Plasma HIV-RNA levels and CD4<sup>+</sup> T cell counts of PWH on ART. Levels of plasma HIV-1 RNA (copies/mL) are plotted with solid orange squares and CD4<sup>+</sup> T cells (cells/ $\mu$ L) are plotted in blue circles against total time on ART. Time values <0 represent measurements taken before ART initiation. Plasma HIV-RNA values below the limit of detection of the assay are indicated in open orange squares. For DEL-SPC-015, -017, and -019, viral load measurements during VRC01 administration and an ATI in the ACTG trial A5340 (IDs A02, A06, and A13, respectively) are not displayed but can be found in Bar et al. (54). For DEL-SPC-012, -015, -017, -019, and JH448, dotted vertical lines represent the starting time of uninterrupted ART.

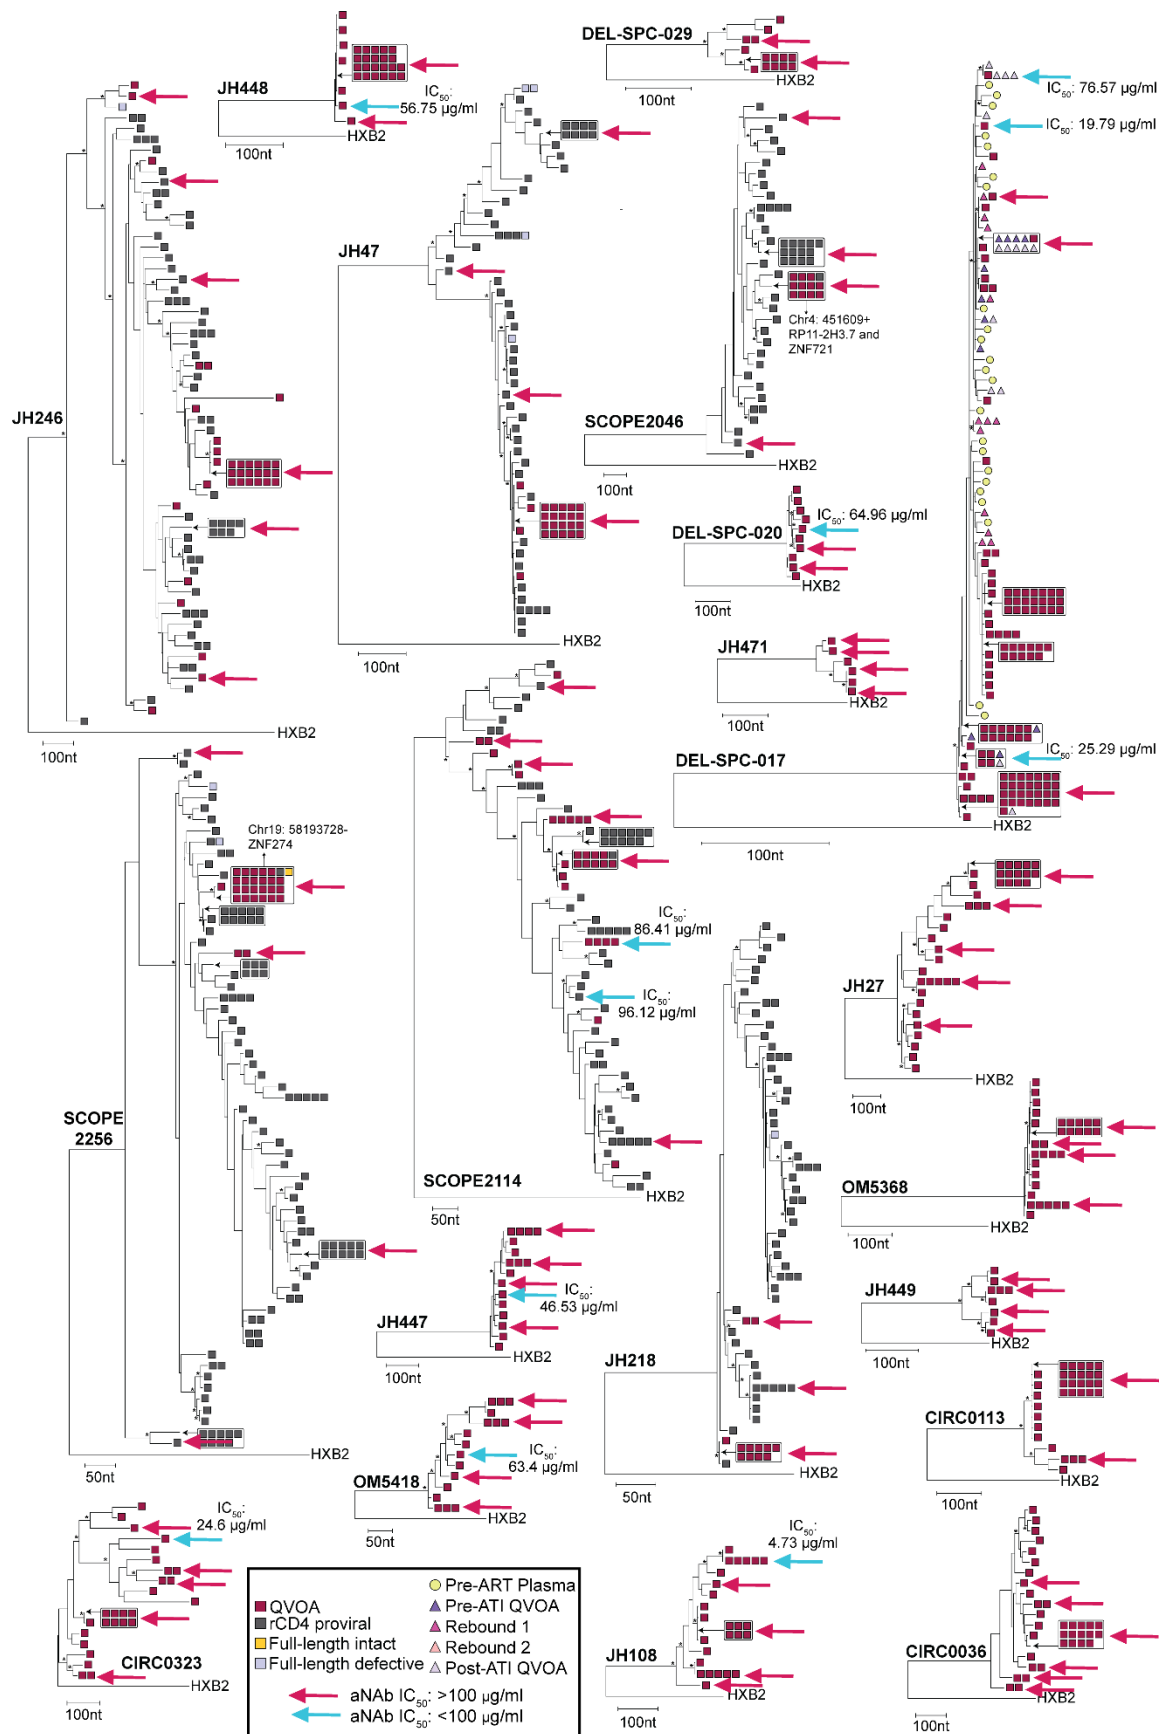

**Supplemental Figure 2.** Neutralization by aNAbs for reservoir viruses of PWH in the aNAb-resistant group. Maximum likelihood phylogenetic trees of intact *env* sequences for participants are shown, with each tree rooted to HXB2. Single genome sequencing of *env* was performed on cDNA reverse-transcribed from extracted viral RNA from p24<sup>+</sup> supernatants of QVOA wells (red squares) or on proviral DNA from resting CD4<sup>+</sup> T cells (rCD4, grey squares). Near full-length genome sequences were obtained from the proviral DNA and are indicated as intact (yellow squares) or defective (blue squares). For DEL-SPC-017, who previously received VRC01 and an ATI in the ACTG trial A5340 (ID A06), sequences are displayed for pre-ART plasma (yellow circles), pre- and post-ATI QVOA samples (purple and lavender triangles), and rebound virus (red and pink triangles) (54, 61). Bootstrap values greater than 70% are denoted with an asterisk. Scale units are represented in nucleotides. Red arrows indicate proviruses resistant to neutralization by contemporaneous aNAbs with IC<sub>50</sub> values >100 µg/ml. Blue arrows indicate proviruses sensitive to neutralization by aNAbs with IC<sub>50</sub> values at the specified value <100 µg/ml. Chromosomal integration sites obtained by integration site loop amplification and corresponding gene name are indicated. Portions of the phylogenetic trees in this figure were modified from Bertagnolli et al. (30) and McMyn et al. (15).

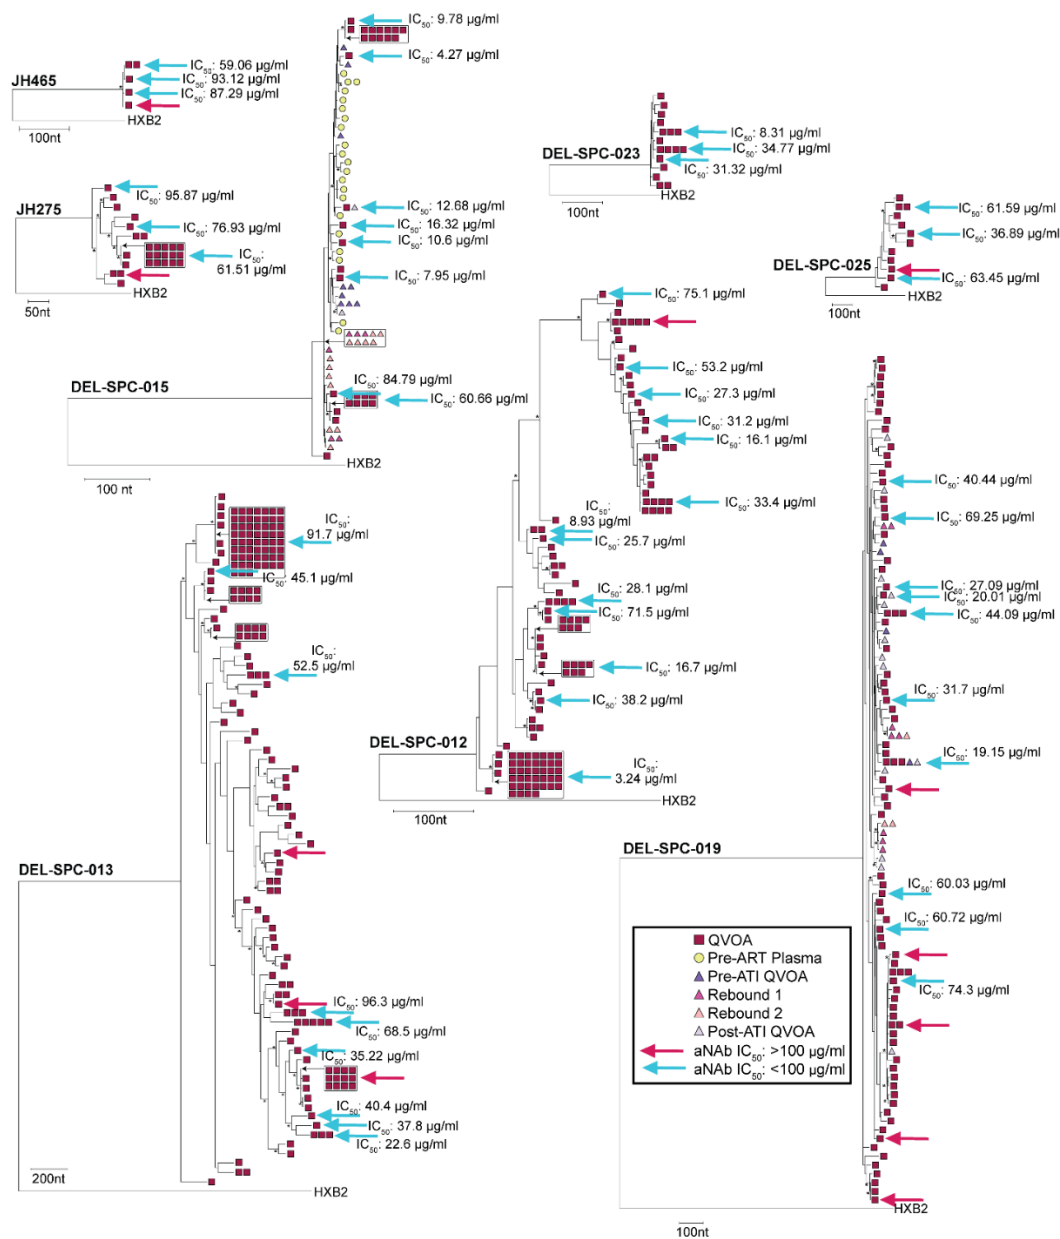

**Supplemental Figure 3.** Neutralization by aNAbs for reservoir viruses of PWH in the aNAb-sensitive group. Maximum likelihood phylogenetic trees of intact *env* sequences for participants are shown with each tree rooted to HXB2. Single genome sequencing of *env* was performed on cDNA reverse-transcribed from extracted viral RNA from p24<sup>+</sup> supernatants of QVOA wells (red squares). For DEL-SPC-015 and -019, who previously received VRC01 and an ATI in the ACTG trial A5340 (IDs A02 and A13, respectively), sequences are displayed for pre-ART plasma virus (yellow circles), pre- and post-ATI QVOA samples (purple and lavender triangles), and rebound virus (red and pink triangles) (54, 61). Bootstrap values greater than 70% are denoted with an asterisk. Scale units are represented in nucleotides. Red arrows indicate proviruses resistant to neutralization by aNAbs with IC<sub>50</sub> values >100 µg/ml. Blue arrows indicate proviruses sensitive to neutralization by aNAb with IC<sub>50</sub> values at the specified value <100 µg/ml. Portions of the phylogenetic trees in this figure were modified from Bertagnolli et al. (30).

DELSPC012  
 DELSPC013  
 DELSPC015  
 DELSPC019  
 DELSPC023  
 DELSPC025  
 JH275  
 JH465  
 DELSPC017  
 DELSPC020  
 DELSPC029  
 JH447  
 JH471  
 JH448  
 JH449  
 OM5368  
 CIRC0036  
 CIRC0113  
 CIRC0323  
 OM5418  
 JH108  
 JH246  
 JH218  
 JH47  
 JH27  
 SCOPE2046  
 SCOPE2114  
 SCOPE2256

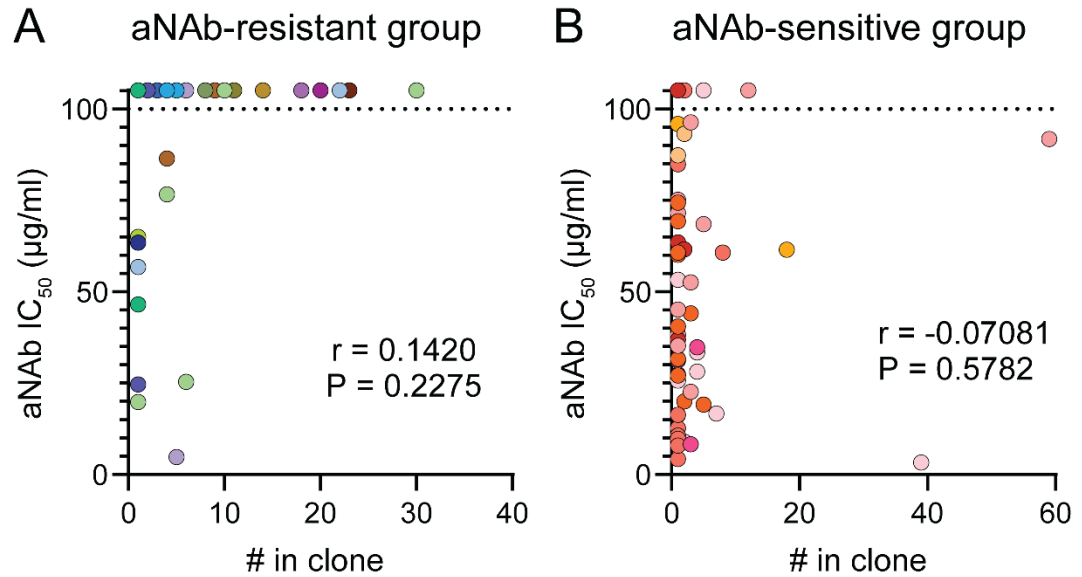

**Supplemental Figure 4.** No correlation between aNAb IC<sub>50</sub> values and the number of isolates with identical *env* sequences. aNAb IC<sub>50</sub> values for distinct isolates are replotted from Figure 2A for (A) the aNAb-resistant group (n = 74) and (B) the aNAb-sensitive group (n = 64) against the number of isolates with identical *env* sequences for the corresponding pseudovirus. Spearman's correlation values are shown.

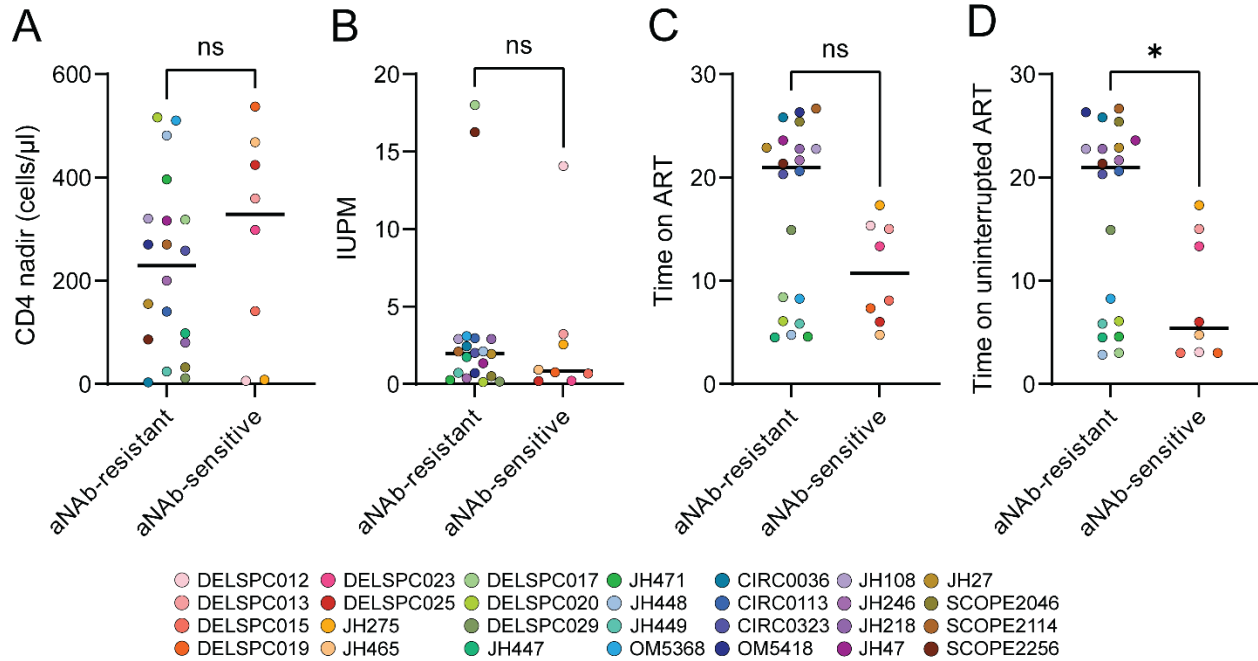

**Supplemental Figure 5.** Clinical history and reservoir characteristics compared between participants in the aNAb-resistant and aNAb-sensitive groups. Comparisons between aNAb-resistant group (n = 20 PWH) and aNAb-sensitive group (n = 8 PWH) values for **(A)** CD4 nadir, **(B)** IUPM, **(C)** time on ART, and **(D)** time on uninterrupted ART. Significance was calculated using the Mann Whitney test. \* =  $P < 0.05$ .



DELSPC012  
 DELSPC013  
 DELSPC015  
 DELSPC019  
 DELSPC023  
 DELSPC025  
 JH275  
 JH465  
 DELSPC017  
 DELSPC020  
 DELSPC029  
 JH447  
 JH471  
 JH448  
 JH449  
 OM5368  
 CIRC0036  
 CIRC0113  
 CIRC0323  
 OM5418  
 JH108  
 JH246  
 JH218  
 JH47  
 JH27  
 SCOPE2046  
 SCOPE2114  
 SCOPE2256

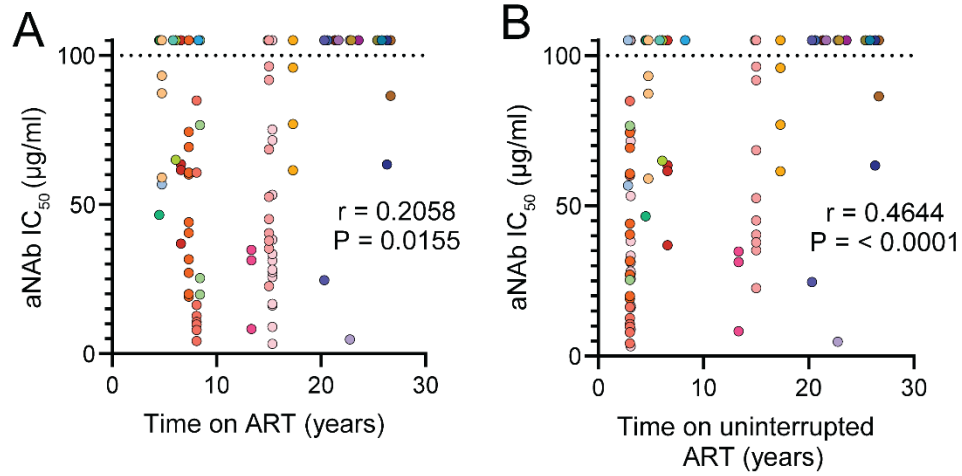

**Supplemental Figure 6.** Relationship between aNAb neutralization and time on ART. aNAb IC<sub>50</sub> values from Figure 1A correlate with (A) total time on ART including short treatment interruptions (Spearman's correlation,  $n = 138$ ) and (B) time on uninterrupted ART (Spearman's correlation,  $n = 138$ ). Inclusion of multiple isolates from individual PWH give data points with the same x-axis values.

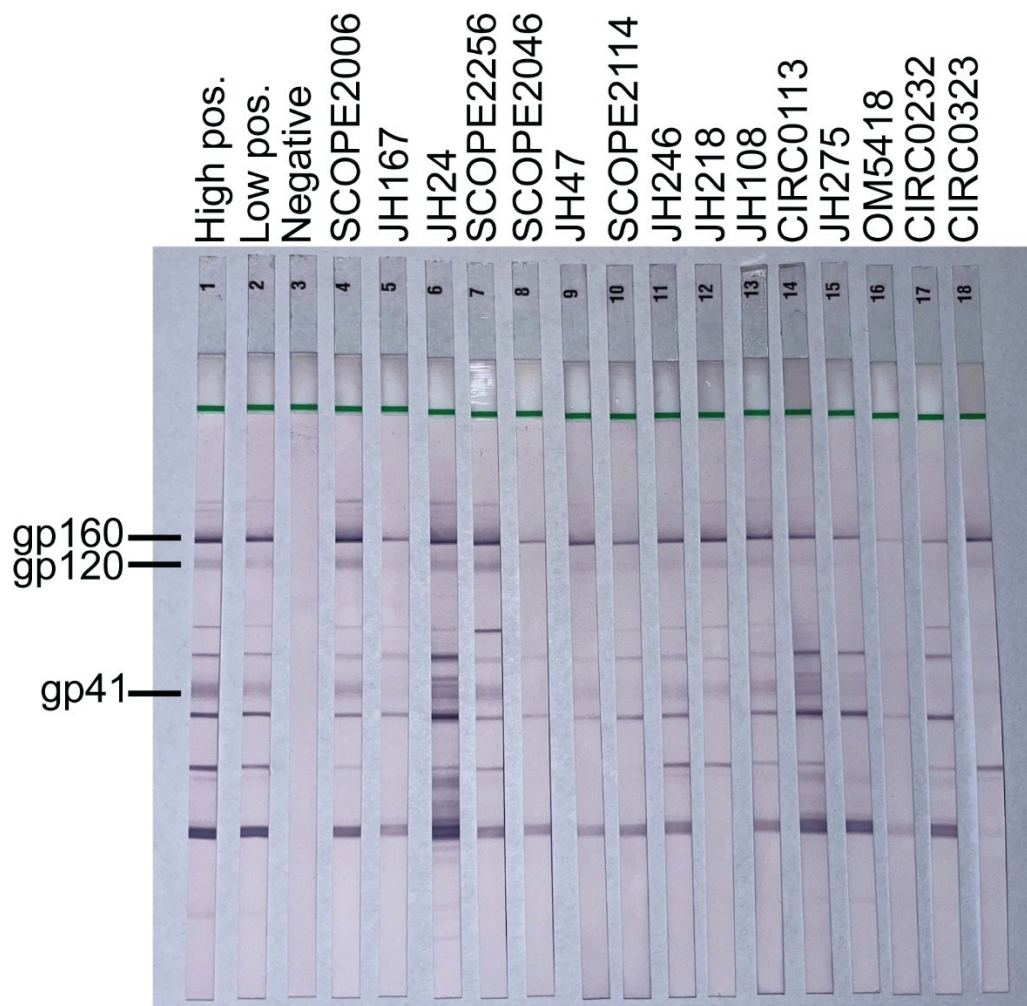

**Supplemental Figure 7.** HIV-1 western blot analysis of IgG purified from plasma of PWH on long-term ART. The first three columns are the high and low positive controls and the negative control. The following columns detect antibodies to HIV-1 for the indicated participants. Lanes 4-6 represent PWH with one or no outgrowth wells. Lanes 7-14, 16, and 18 represent PWH in the aNAb-resistant group. Lane 15 is a PWH in the aNAb-sensitive group. Lane 17 is a PWH on ART for over 20 years, initiating ART during acute infection and therefore excluded from this study. Bands for HIV-1 Env gp160, gp120, and gp41 are labeled.

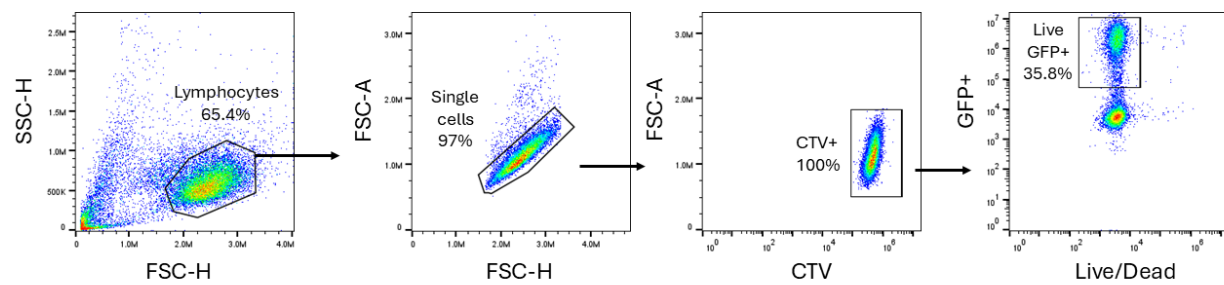

**Supplemental Figure 8.** Gating strategy for ADCC experiments illustrated using a representative control well with infected CEM.NKR.CCR5 cells and no NK cells. Gates were based on lymphocyte size (SSC-H, FSC-H) → single cells (FSC-A, FSC-H) → CTV<sup>+</sup> (FSC-A, CTV) → GFP<sup>+</sup>, live (GFP, LIVE/DEAD Fixable Near-IR). From this analysis, we determined the percentage of CTV<sup>+</sup> single lymphocytes that were GFP<sup>+</sup> and viable:  $(\text{viable, GFP}^+ \text{CTV}^+ / \text{CTV}^+) \times 100$ . ADCC was assessed using this value normalized to the control wells with IgG from uninfected donors.

**Supplemental Table 1.** Characteristics of study participants.

| ID                       | Age <sup>A</sup> | Sex | Race <sup>B</sup> | Time Since Diagnosis (Years) | Time on ART Regimen (years) | Current ART regimen <sup>C</sup> | CD4 nadir (cells/ $\mu$ l) | Plasma HIV-1 RNA (copies/mL) <sup>A,D</sup> |
|--------------------------|------------------|-----|-------------------|------------------------------|-----------------------------|----------------------------------|----------------------------|---------------------------------------------|
| DEL-SPC-012 <sup>E</sup> | 46               | M   | B                 | 21.0                         | 15.3                        | ABC/DTG/3TC                      | 6                          | <20                                         |
| DEL-SPC-015 <sup>E</sup> | 50               | M   | B                 | 8.5                          | 8.1                         | ATV/r                            | 141                        | <20                                         |
| DEL-SPC-017 <sup>E</sup> | 57               | M   | B                 | 9.5                          | 8.4                         | BIC/FTC/TAF                      | 318                        | <20                                         |
| DEL-SPC-019 <sup>E</sup> | 51               | M   | B                 | 7.4                          | 7.3                         | BIC/FTC/TAF                      | 537                        | <20                                         |
| DEL-SPC-020 <sup>E</sup> | 34               | M   | B                 | 7.1                          | 6.1                         | ABC/DTG/3TC                      | 516                        | <20                                         |
| DEL-SPC-023 <sup>E</sup> | 51               | F   | B                 | 14.6                         | 13.3                        | BIC/FTC/TAF                      | 298                        | <20                                         |
| DEL-SPC-025 <sup>E</sup> | 42               | M   | B                 | 6.6                          | 6.0                         | EVG/c/FTC/TAF                    | 424                        | <20                                         |
| JH448                    | 27               | M   | B                 | 7.5                          | 4.8                         | BIC/FTC/TAF                      | 481                        | <20                                         |
| JH447                    | 32               | M   | B                 | 4.5                          | 4.5                         | BIC/FTC/TAF                      | 98                         | <20                                         |
| JH471                    | 29               | M   | W                 | 4.6                          | 4.6                         | BIC/FTC/TAF                      | 396                        | 30                                          |
| JH465                    | 24               | M   | B                 | 4.8                          | 4.8                         | BIC/FTC/TAF                      | 468                        | <20                                         |
| JH449                    | 35               | M   | B                 | 5.8                          | 5.8                         | BIC/FTC/TAF                      | 24                         | <20                                         |
| OM5368                   | 60               | M   | W                 | 8.3                          | 8.3                         | BIC/FTC/TAF                      | 510                        | <20                                         |
| JH246                    | 68               | M   | B                 | 25.3                         | 21.7                        | DTG/DOR                          | >200                       | <20                                         |
| JH108                    | 57               | F   | B                 | 22.9                         | 22.8                        | ABC/DTG/3TC                      | 320                        | <20                                         |
| JH47                     | 48               | M   | B                 | 30.4                         | 23.6                        | BIC/FTC/TAF                      | 316                        | <20                                         |
| JH218                    | 72               | M   | W                 | 30.8                         | 22.8                        | BIC/FTC/TAF                      | 80                         | <20                                         |
| JH27                     | 68               | F   | B                 | 28.8                         | 22.9                        | ABC/DTG/3TC                      | 155                        | <20                                         |
| JH275                    | 66               | M   | B                 | 30.3                         | 17.3                        | RPV/DTG                          | 8                          | <20                                         |
| SCOPE2046                | 56               | M   | PI                | 30.8                         | 25.4                        | BIC/FTC/TAF, ECV                 | 32                         | <30                                         |
| SCOPE2256                | 67               | M   | W                 | 36.7                         | 21.3                        | DTG, RPV/TAF/FTC                 | 86                         | <30                                         |
| SCOPE2114                | 81               | M   | W                 | 36.3                         | 26.7                        | BIC/FTC/TAF                      | 270                        | <30                                         |
| CIRC0036                 | 70               | M   | W                 | 37.8                         | 25.8                        | RPV/FTC/TAF/EVG/c                | 3                          | <20                                         |
| OM5418                   | 56               | M   | W                 | 28.4                         | 26.3                        | BIC/FTC/TAF/DOR                  | 270                        | <20                                         |
| CIRC0113                 | 57               | M   | W                 | 29.8                         | 20.6                        | ABC/DTG/3TC                      | 140                        | <40                                         |
| CIRC0323                 | 60               | M   | W                 | 32.7                         | 20.3                        | MVC/DOR/DTG                      | 258                        | <40                                         |
| DEL-SPC-013 <sup>E</sup> | 61               | M   | B                 | 19.0                         | 15.0                        | BIC/FTC/TAF                      | 185                        | <20                                         |
| DEL-SPC-029 <sup>E</sup> | 55               | M   | B                 | 16.6                         | 14.9                        | BIC/FTC/TAF                      | 11                         | <20                                         |
| JH24                     | 62               | M   | B                 | 29.8                         | 19.1                        | DTG/RPV                          | 286                        | <20                                         |
| JH167                    | 67               | F   | B                 | 24.8                         | 22.4                        | BIC/FTC/TAF                      | 145                        | <20                                         |
| SCOPE2006                | 71               | M   | W                 | 27.4                         | 25.7                        | FTC/TAF, DTG                     | 9                          | <30                                         |
| Mean                     | 54               |     |                   | 20.3                         | 15.9                        |                                  | 225                        |                                             |

<sup>A</sup>At most recent sample date.<sup>B</sup>Black; W, White; H, Hispanic, PI, Pacific Islander.<sup>C</sup>Abbreviations: 3TC, lamivudine; ABC, abacavir; ATV, Atazanavir; BIC, bictegravir; /c, cobicistat; DOR, doravirine; DTG, dolutegravir; ECV, entecavir; EVG, elvitegravir; FTC, emtricitabine; MVC, maraviroc; RPV, rilpivirine; /r, ritonavir; TAF, tenofovir alafenamide.<sup>D</sup>Plasma HIV-1 RNA levels were measured using the Hologic Aptima and Cobas assays.<sup>E</sup>Denotes participants that were included in the prior study (30).

**Supplemental Table 2.** Isolates with IIP > 5.

| Donor_Isolate      | Group     | Hill coefficient <sup>A</sup><br>( <i>m</i> ) | IC <sub>50</sub> <sup>A</sup><br>(µg/ml) | IIP <sup>B</sup> | # of identical<br>isolates | Years on<br>uninterrupted ART |
|--------------------|-----------|-----------------------------------------------|------------------------------------------|------------------|----------------------------|-------------------------------|
| DEL-SPC-015_UD.B32 | sensitive | 2.20                                          | 12.68                                    | 6.37             | 1                          | 3                             |
| DEL-SPC-015_UD.B18 | sensitive | 2.29                                          | 10.6                                     | 6.81             | 1                          | 3                             |
| DEL-SPC-015_ST.A03 | sensitive | 1.87                                          | 9.78                                     | 5.62             | 1                          | 3                             |
| JH108_A03          | resistant | 1.79                                          | 4.73                                     | 5.96             | 5                          | 22.75                         |

<sup>A</sup>Determined using the median effect equation (83).

<sup>B</sup>IIP of aNAbs at 10 mg/ml

**Supplemental Table 3.** Variable sensitivity of isolates from the aNAb-resistant group to neutralization by bNAbs.

| Donor_Isolate     | aNAb IC <sub>50</sub> (μg/ml) | bNAb IC <sub>50</sub> (μg/ml) |         |          |
|-------------------|-------------------------------|-------------------------------|---------|----------|
|                   |                               | VRC01                         | 10-1074 | PGDM1400 |
| JH108_A03         | 4.73                          | 1.9                           | 1.26    | >4       |
| DEL-SPC-017_ABB18 | 19.79                         | 0.746                         | 0.004   | >4       |
| CIRC0323_B46      | 24.6                          | >4                            | >4      | 0.531    |
| DEL-SPC-017_ABB21 | 25.29                         | 1.093                         | 0.01    | >4       |
| JH447_B29         | 46.531                        | 0.732                         | >4      | >4       |
| JH448_A07         | 56.75                         | 0.172                         | 0.114   | 0.726    |
| JH5418_A14        | 63.4                          | 1.27                          | 0.038   | >4       |
| DEL-SPC-020-UDA19 | 64.96                         | 1.09                          | >4      | 0.388    |
| DEL-SPC-017_STC04 | 76.57                         | 0.824                         | 0.008   | >4       |
| SCOPE2114_B21     | 86.41                         | 1.29                          | 4       | >4       |
| DEL-SPC-017_STC11 | >100                          | 1.336                         | 0.012   | >4       |
| DEL-SPC-017_STA01 | >100                          | 0.867                         | 0.007   | >4       |
| DEL-SPC-017_ABB17 | >100                          | 0.731                         | <0.032  | >4       |
| DEL-SPC-020_STA10 | >100                          | 1.31                          | >4      | 0.323    |
| DEL-SPC-020_STA13 | >100                          | 0.76                          | >4      | 0.39     |
| DEL-SPC-029_ABB53 | >100                          | >4                            | >4      | >4       |
| DEL-SPC-029_STB57 | >100                          | >4                            | >4      | >4       |
| SCOPE2256-A15     | >100                          | 0.34                          | >4      | >4       |
| SCOPE2256-A24     | >100                          | 1.48                          | >4      | >4       |
| JH47_A07          | >100                          | 1.74                          | >4      | 0.49     |
| SCOPE2046-A24     | >100                          | 0.75                          | 0.53    | 0.16     |
| JH246_A34         | >100                          | 1.82                          | 0.12    | >4       |
| JH246_A22         | >100                          | >4                            | 0.093   | 0.09     |
| JH246_A03         | >100                          | 1.45                          | 0.61    | >4       |
| JH246_A01         | >100                          | 0.85                          | 0.14    | 0.26     |
| JH218_A09         | >100                          | 0.93                          | 0.258   | >4       |
| JH218_A03         | >100                          | >4                            | 1.43    | 0.382    |
| SCOPE2114_B42     | >100                          | 0.66                          | >4      | 2.19     |
| SCOPE2114_B06     | >100                          | 1.97                          | >4      | 0.097    |
| SCOPE2114_B01     | >100                          | 2.78                          | >4      | 0.89     |
| SCOPE2114_B09     | >100                          | 3.42                          | >4      | 0.39     |

|              |      |       |        |        |
|--------------|------|-------|--------|--------|
| JH108_A04    | >100 | >4    | 2.2    | 2.1    |
| JH108_A02    | >100 | 3.66  | 0.62   | >4     |
| JH108_A14    | >100 | >4    | 2.46   | 0.086  |
| JH108_A01    | >100 | 3.45  | 3.31   | 1.57   |
| CIRC0113_A03 | >100 | >4    | >4     | >4     |
| CIRC0113_A09 | >100 | >4    | >4     | >4     |
| OM5418_A03   | >100 | 2.14  | 0.19   | >4     |
| OM5418_A10   | >100 | 0.91  | 0.035  | >4     |
| OM5418_B39   | >100 | 1.05  | <0.032 | >4     |
| OM5418_A07   | >100 | 0.42  | 0.056  | >4     |
| CIRC0323_A06 | >100 | >4    | 0.131  | 1.13   |
| CIRC0323_A05 | >100 | 2.48  | 0.586  | 1.58   |
| CIRC0323_B03 | >100 | >4    | >4     | 1.61   |
| CIRC0323_B18 | >100 | 0.61  | >4     | >4     |
| CIRC0323_A08 | >100 | 2     | 0.062  | 0.621  |
| JH27_A04     | >100 | 0.78  | >4     | 0.5    |
| JH27_A09     | >100 | 0.821 | >4     | 0.261  |
| JH27_A11     | >100 | 0.27  | 1.08   | 0.266  |
| JH27_A21     | >100 | 0.81  | >4     | 0.22   |
| JH27_B22     | >100 | 1.22  | 2.28   | 0.531  |
| CIRC0036_A13 | >100 | 1.22  | 3.81   | 1.44   |
| CIRC0036_A16 | >100 | 0.44  | 0.74   | >4     |
| CIRC0036_B13 | >100 | 1.67  | 0.79   | >4     |
| CIRC0036_B17 | >100 | 1.79  | >4     | 2.08   |
| CIRC0036_B51 | >100 | 0.74  | 0.48   | >4     |
| CIRC0036_C02 | >100 | 0.74  | 0.73   | >4     |
| JH448_A02    | >100 | 0.391 | 0.136  | 0.671  |
| JH448_B07    | >100 | 1.513 | <0.032 | 1.008  |
| JH447_B04    | >100 | 0.82  | >4     | >4     |
| JH447_B13    | >100 | 0.679 | >4     | >4     |
| JH447_B18    | >100 | 0.885 | >4     | >4     |
| JH447_B34    | >100 | 0.842 | >4     | 3.26   |
| OM5368_A05   | >100 | 0.111 | >4     | <0.032 |
| OM5368_A07   | >100 | 0.179 | >4     | <0.032 |
| OM5368_A09   | >100 | 0.146 | >4     | <0.032 |

|            |      |       |       |        |
|------------|------|-------|-------|--------|
| OM5368_B04 | >100 | 0.103 | >4    | <0.032 |
| JH471_A07  | >100 | >4    | 2.63  | <0.032 |
| JH471_A08  | >100 | >4    | 1.55  | 0.127  |
| JH471_A10  | >100 | >4    | 2.66  | 0.387  |
| JH471_B08  | >100 | 3.136 | 3.073 | 0.966  |
| JH449_B05  | >100 | 1.33  | >4    | 0.106  |
| JH449_B25  | >100 | 2.195 | >4    | 0.063  |
| JH449_C02  | >100 | 1.33  | >4    | <0.032 |

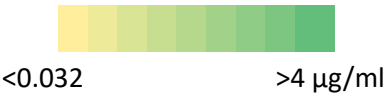

Supplement: sd2 [file 2]
